# Supplementary material for: Towards an all-copper redox flow battery based on a copper-containing ionic liquid
Source: Royal Society of Chemistry journal article supplement (doi:10.1039/c5cc06774j), 2015-10-30
Supplement: c5cc06774j1.pdf [file c5cc06774j1.pdf]

# Supporting information

## Towards an all-copper redox flow battery based on a copper-containing ionic liquid

Stijn Schaltin, Yun Li, Neil R. Brooks, Jeroen Sniekers, Ivo F.J. Vankelecom,  
Koen Binnemans, Jan Fransaer

### Experimental

Tetrakis(acetonitrile) copper(I) bis(trifluoromethylsulfonyl)imide (abbreviated as  $[\text{Cu}(\text{MeCN})_4][\text{Tf}_2\text{N}]$ ) was prepared according to a literature procedure, by reacting copper(II) oxide with bis(trifluoromethylsulfonyl)imidic acid in water to yield copper(II) bis(trifluoromethylsulfonyl)imide [1]. The copper(II) salt  $\text{Cu}(\text{Tf}_2\text{N})_2 \cdot 4\text{H}_2\text{O}$  was isolated by drying *in vacuo* and then redissolved in acetonitrile. A comproportionation reaction between copper metal (added as a powder) and the copper(II) ions yielded  $[\text{Cu}(\text{MeCN})_4][\text{Tf}_2\text{N}]$ , which was then isolated by removing the solvent acetonitrile *in vacuo*. The reaction sequence is:

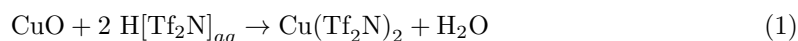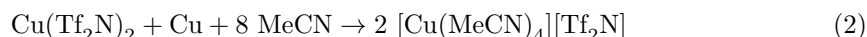

The melting point of  $[\text{Cu}(\text{MeCN})_4][\text{Tf}_2\text{N}]$  is 66 °C and the concentration of copper in this compound is 3.1 mol dm<sup>-3</sup>. More details on the synthesis and chemical characterization of  $[\text{Cu}(\text{MeCN})_4][\text{Tf}_2\text{N}]$  can be found elsewhere [1].

Voltammetry and RDE experiments were performed in an argon-filled glove box. The experiments were done using a Potentiostat/Galvanostat EG&G 273 controlled by a computer with Corrware software. All potentials are relative to a copper wire directly immersed in solution (pseudo-reference electrode). The electrode was a platinum disk (diameter of 3 mm). The rotation rate of the rotating disk electrode was controlled by a Metrohm Autolab RDE controller. All electrochemical experiments were performed at 90 °C.

Charge-discharge experiments were executed in a commercially available closed H-type glass cell consisting of two double-walled compartments (1 mL each, corresponding to a charge of 300 C). It was purchased from SES GmbH - Analytical Systems. The temperature was set by pumping water, whose temperature was controlled by a standard laboratory heating pump, through the outer wall.

The compartments are separated by a Morgane<sup>TM</sup> membrane, which is a cross-linked post-quaternized ethylene tetrafluoroethylene-chloromethylstyrene copolymer (anion exchange membrane [2]). Each compartment was mixed by a small magnetic stirrer. The anode and cathode were two platinum spiral electrodes. A current of 2 mA was applied during both charging and discharging of the cell, and the discharge cut-off voltage was 0.0 V.

### References

- [1] N. R. Brooks, S. Schaltin, K. Van Hecke, L. Van Meervelt, K. Binnemans, J. Fransaer, Copper(I)-containing ionic liquids for high-rate electrodeposition, *Chem. Eur. J.* 17 (2011) 5054.
- [2] T. Xu, Ion exchange membranes: state of their development and perspective, *J. Membrane Sci.* 263 (2005) 1.
